# Supplementary material for: Δ133p53α enhances metabolic and cellular fitness of TCR-engineered T cells and promotes superior antitumor immunity
Source: PubMed Central journal article supplement (PMC8194333; doi:10.1136/jitc-2020-001846), 2021-06-10
Supplement: jitc-2020-001846supp001.pdf [file jitc-2020-001846supp001.pdf]

jitc-2020-001846.R2

1 **Supplemental Information**

2

3 **Δ133p53α enhances metabolic and cellular fitness of TCR-engineered T cells**  
4 **and promotes superior antitumor immunity**

5

6 **Authors:** KEVIN J. LEGSCHA<sup>1</sup>, EDITE A. FERREIRA<sup>1</sup>, ANTONIOS CHAMOUN<sup>1</sup>, ALEXANDER LANG<sup>1</sup>, MOHAMED  
7 HS. AWWAD<sup>2</sup>, GIGI NHQ TON<sup>2</sup>, DANUTA GALETZKA<sup>3</sup>, BORHANE GUEZGUEZ<sup>1,4,5</sup>, MICHAEL HUNDEMER<sup>2</sup>, JEAN-  
8 CHRISTOPHE BOURDON<sup>6</sup>, MARKUS MUNDER<sup>1,7</sup>, MATTHIAS THEOBALD<sup>1,4,7</sup>, HAKIM ECHCHANNAOUI<sup>1,4</sup>

9

10 **Affiliations:** <sup>1</sup>THIRD DEPARTMENT OF MEDICINE, UNIVERSITY CANCER CENTER (UCT), UNIVERSITY MEDICAL  
11 CENTER (UMC) OF THE JOHANNES GUTENBERG UNIVERSITY

12 <sup>2</sup>DEPARTMENT OF INTERNAL MEDICINE V, UNIVERSITY OF HEIDELBERG

13 <sup>3</sup>DEPARTMENT OF RADIATION ONCOLOGY AND RADIOTHERAPY, UMC OF THE JOHANNES GUTENBERG  
14 UNIVERSITY

15 <sup>4</sup>GERMAN CANCER CONSORTIUM (DKTK), PARTNER SITE FRANKFURT/MAINZ, MAINZ, GERMANY

16 <sup>5</sup>GERMAN CANCER RESEARCH CENTER (DKFZ), HEIDELBERG, GERMANY

17 <sup>6</sup>SCHOOL OF MEDICINE, UNIVERSITY OF DUNDEE, DUNDEE, UK

18 <sup>7</sup>RESEARCH CENTER FOR IMMUNOTHERAPY, UMC OF THE JOHANNES GUTENBERG UNIVERSITY MAINZ,  
19 GERMANY

20

21 **Correspondence to:** Hakim Echchannaoui | Tel: +49 6131 17-9722 | Email: [echchann@uni-mainz.de](mailto:echchann@uni-mainz.de)

22

23

24

25

26

27

28

29

30

31

32

33

34

35

36

37

38

39

40

jtc-2020-001846.R2

1 **Supplemental data**

2

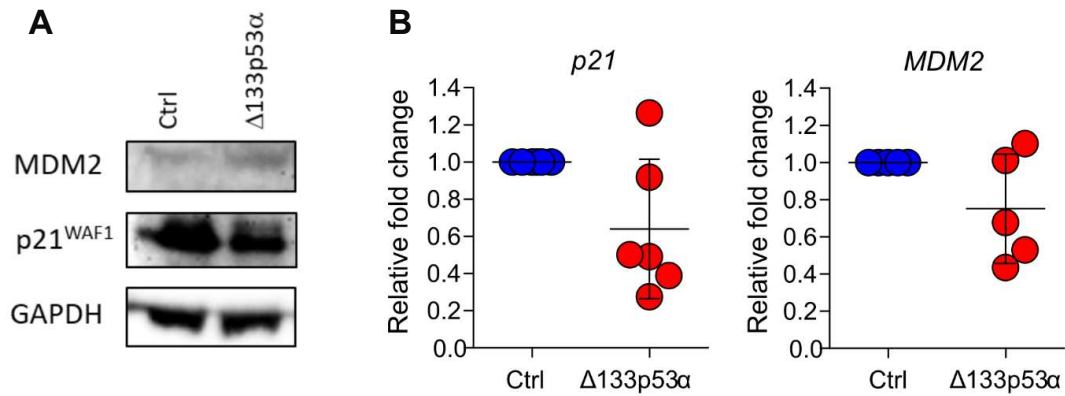

3

4 **Figure S1.**  $\Delta 133p53\alpha$  modulates the function of the full-length p53. (A) Immunoblot analysis  
5 of the expression of p21<sup>Waf1/Cip1</sup> and MDM2 as p53 target genes in human CD8<sup>+</sup> T cells  
6 transduced with an empty control (ctrl) vector or retroviral vector encoding for  $\Delta 133p53\alpha$   
7 isoform. (B) Summary data from 5-6 healthy are shown. Data were normalized to GAPDH and  
8 shown as relative fold change to Ctrl samples.

9

10

11

12

13

14

15

16

17

18

19

20

21

jtc-2020-001846.R2

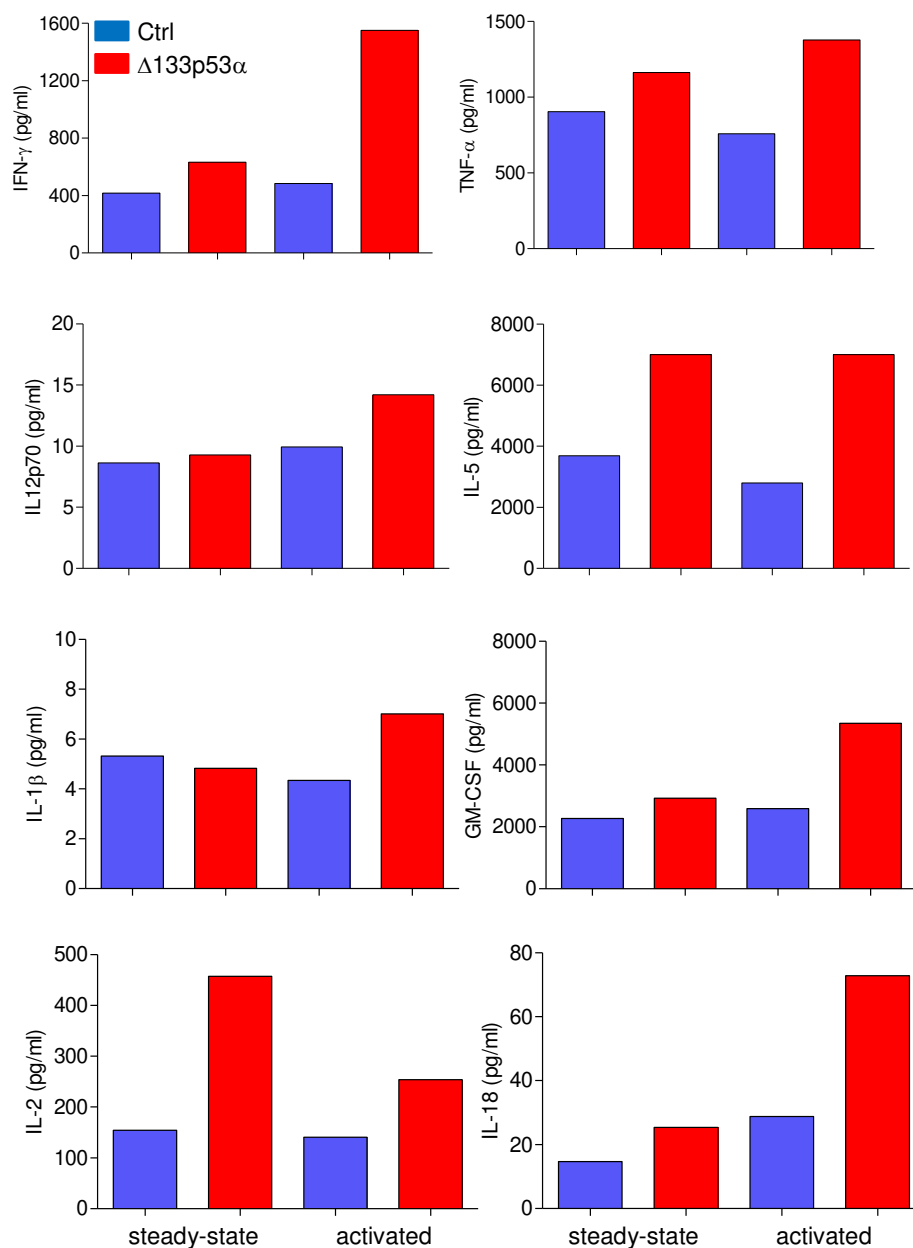

1

2

3 **Figure S2.**  $\Delta 133p53\alpha$  invigorates cytokine response of antigen TCR-engineered T cells.4 Cytokine profiles of  $\Delta 133p53\alpha$ -overexpressing and control T cells under steady-state

5 (=resting) and after tumor antigen encounter (=activated) as measured by Multiplex

6 Immunoassay at late stage in vitro culture. For activation, T cells were cultured over 24 hours

7 with target tumor cells Saos2/143 (E:T = 1:1).

8

3

jitic-2020-001846.R2

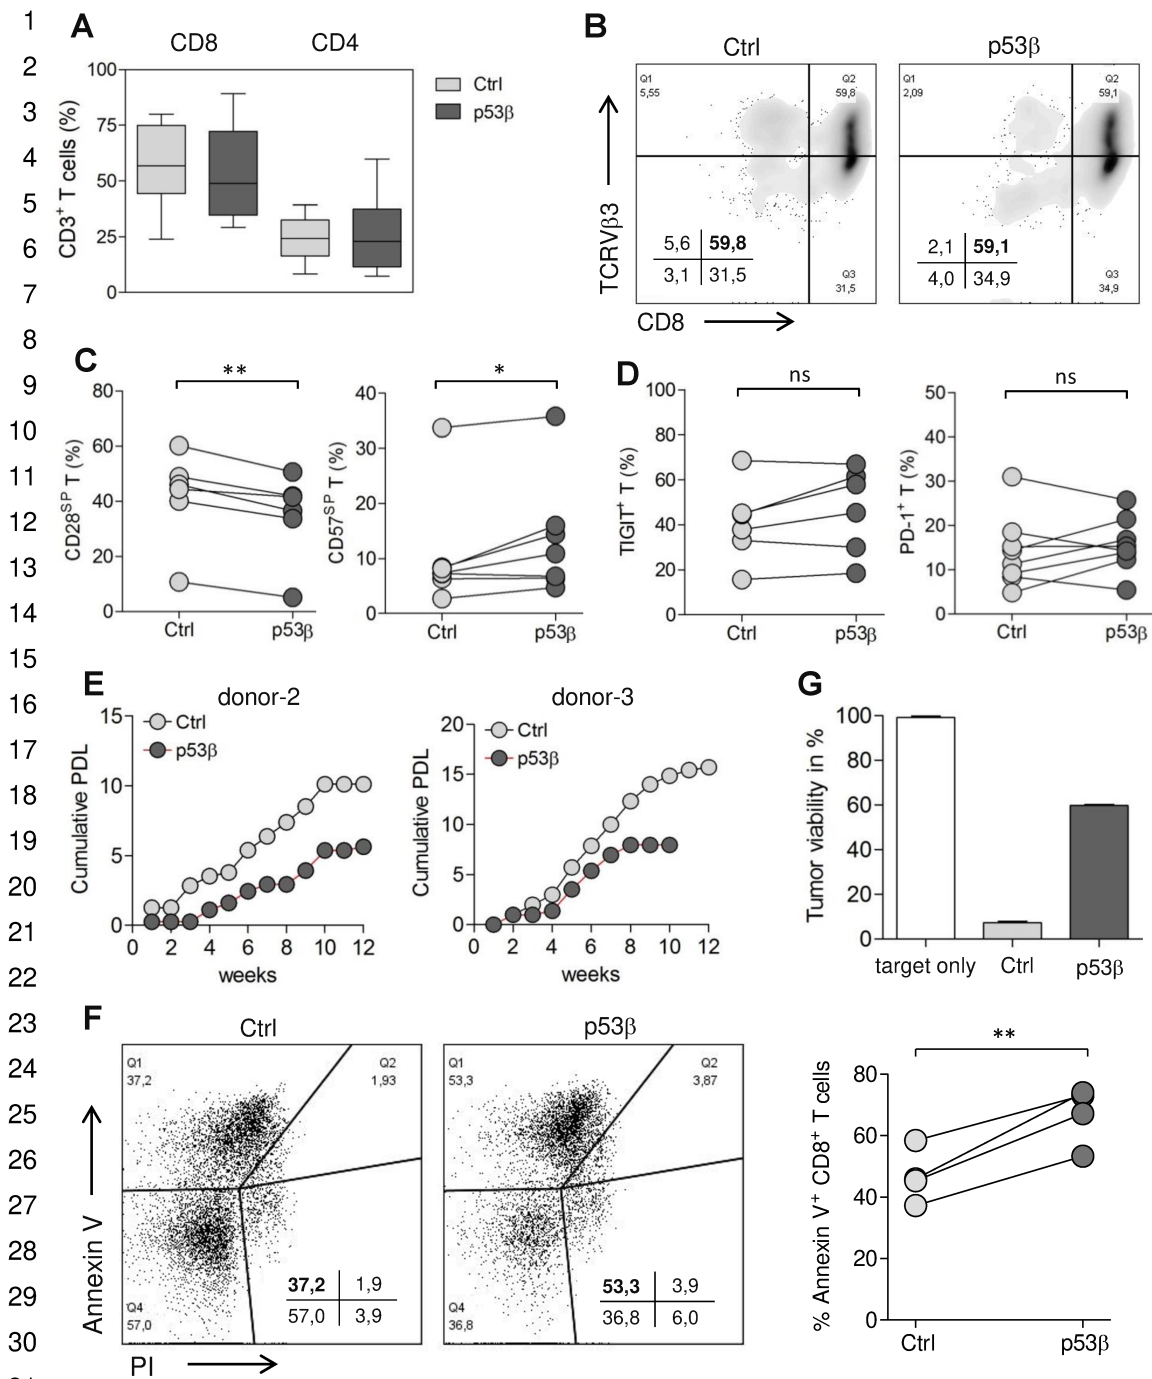

32 **Figure S3.** Characterization of p53β-driven senescence in engineered human CD8<sup>+</sup> T cells.

33 (A) Percentage of CD8<sup>+</sup> and CD4<sup>+</sup> T cells for paired samples of p53β-modified or control T  
34 cells from healthy donors (n=9 biological replicates). (B) Representative flow plots for the cell  
35 surface expression of the transduced scTCR in CD8<sup>+</sup> T cells, which was determined by flow

jitc-2020-001846.R2

1 cytometry using anti-TCRV $\beta$ 3 mAb. (C) Flow cytometry plots depicting cell surface expression  
2 of CD28 and CD57 single positive (SP) for paired samples of p53 $\beta$ -modified or control CD8<sup>+</sup> T  
3 cells from different donors (n $\geq$ 6). (D) Difference in TIGIT and PD-1 expression between control  
4 and p53 $\beta$ -transduced cells shown for each individual donor (n $\geq$ 6). (E) Cumulative PDL of  
5 control and p53 $\beta$ -transduced CD8<sup>+</sup> T cells over time from two representative donors. (F)  
6 Representative flow plots of Annexin V and Propidium Iodide (PI) staining for control and p53 $\beta$ -  
7 transduced T cells, and the corresponding graphs depicting individual donors (n=4). (G) Long-  
8 term cytolytic activity of p53 $\beta$ -modified compared to control T cells as determined by Tumor  
9 Colony-Forming Assay (see Methods section). One representative experiment out of four  
10 biological replicates is shown. \*P < 0.05, \*\*P < 0.01, ns (not significant), by two-tailed Student's  
11 *t* test.

12

13

14

15

16

17

18

19

20

21

22

23

24

25

26

27

28

29

30

31

32

33

34

35

jitic-2020-001846.R2

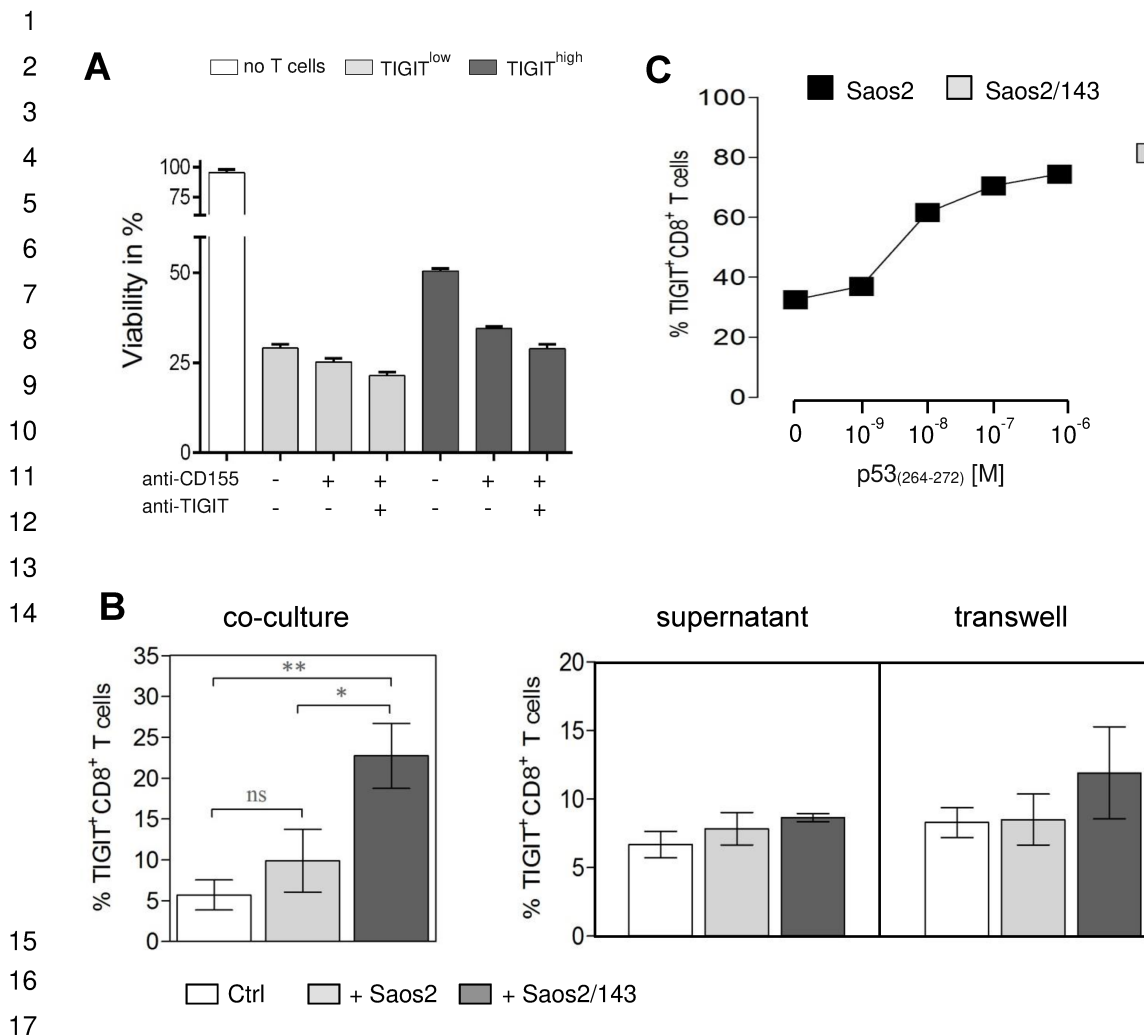

18 **Figure S4.** TIGIT expression in T cells is antigen-dependent and affects TCR-mediated  
19 cytolytic response. (A) Effect of CD155 and/or TIGIT blockade on the cytolytic activity of  
20 TIGIT<sup>low</sup> and TIGIT<sup>high</sup> TCR-effector T cells against Saos2/143 target tumors, as determined by  
21 tumor colony-forming based killing assays. (B) Flow cytometric data of TIGIT expression with  
22 or without incubation in cell-free supernatant collected from Saos2<sup>p53null</sup> or Saos2/143. TIGIT  
23 expression of T cells co-cultured with Saos2<sup>p53null</sup> or Saos2/143 under normal conditions or in  
24 transwell system. (C) TIGIT expression of CD8<sup>+</sup> T cells after co-culture with Saos2<sup>p53null</sup>, which  
25 were pulsed with titrated concentrations of the target antigen (p53<sub>264-272</sub> peptide). n ≥ 3  
26 biological replicates. Error bars indicate standard error of mean (SEM). \*P < 0.05, \*\*P < 0.01,  
27 ns (not significant), by two-tailed Student's *t* test.

28  
29

jitic-2020-001846.R2

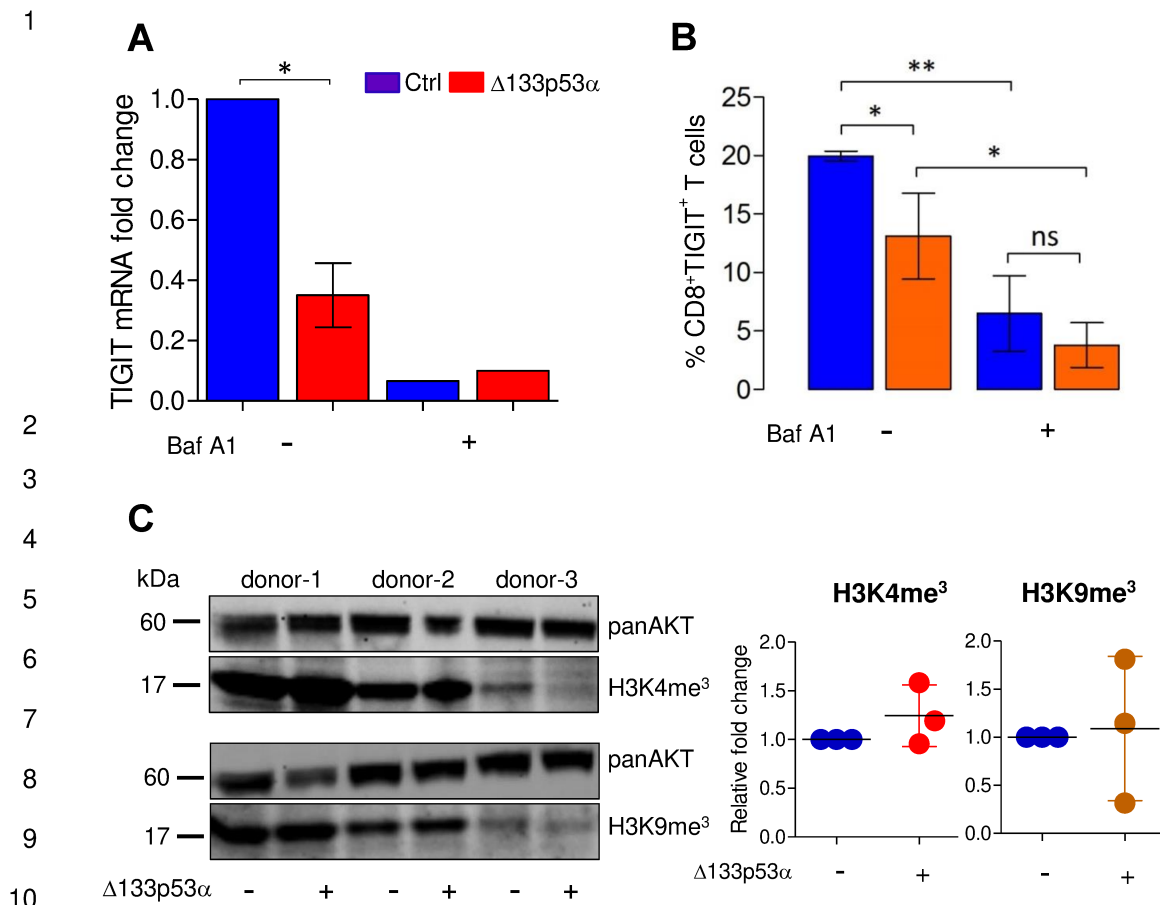

**Figure S5.**  $\Delta 133p53\alpha$  role in the transcriptional regulation of TIGIT expression. (A) Change in fold expression of TIGIT mRNA in engineered human CD8<sup>+</sup> T cells (1-3 weeks post transduction). T cells were treated with bafilomycin A1 for 24h and assessed by qRT-PCR for TIGIT transcripts. Error bars indicate standard error of mean (SEM) (n=3 biological replicates). One representative experiment is depicted for Baf A1 treatment. (B) Flow cytometric data showing the corresponding percentage of CD8<sup>+</sup>TIGIT<sup>+</sup> T cells. Error bars indicate standard error of mean (SEM) (n=3 biological replicates). (C) Protein expression analysis of the histone marks H3K4me<sup>3</sup> and H3K9me<sup>3</sup> in engineered CD8<sup>+</sup> T cells from three different healthy donors (western blots, left panel) and the relative fold change in expression compared to control-T cells (histogram plots, right panel). \* $P < 0.05$ , \*\* $P < 0.01$ , ns (not significant), by two-tailed Student's *t* test.

jitic-2020-001846.R2

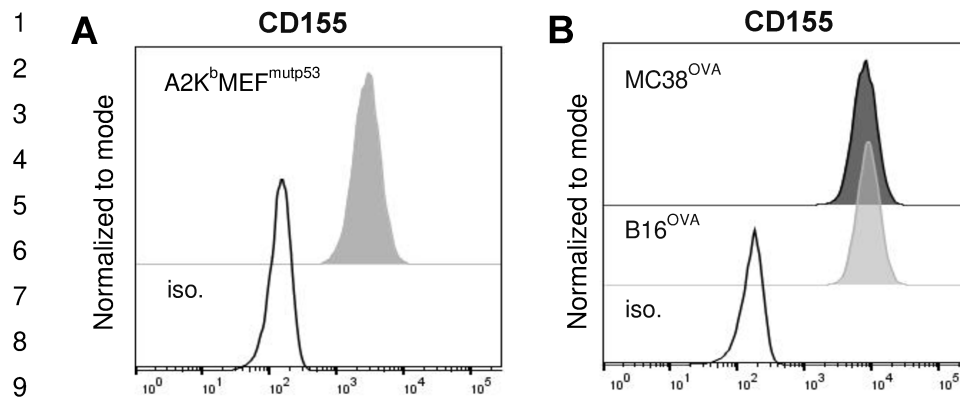

10 **Figure S6.** Expression levels of CD155 for A2K<sup>b</sup>MEF<sup>mutp53</sup> (A) MC38<sup>OVA</sup> and B16<sup>OVA</sup> (B) were  
11 analyzed by flow cytometry.

12  
13  
14  
15  
16  
17  
18  
19  
20  
21  
22  
23  
24  
25  
26  
27  
28  
29  
30  
31  
32  
33  
34  
35  
36



jitc-2020-001846.R2

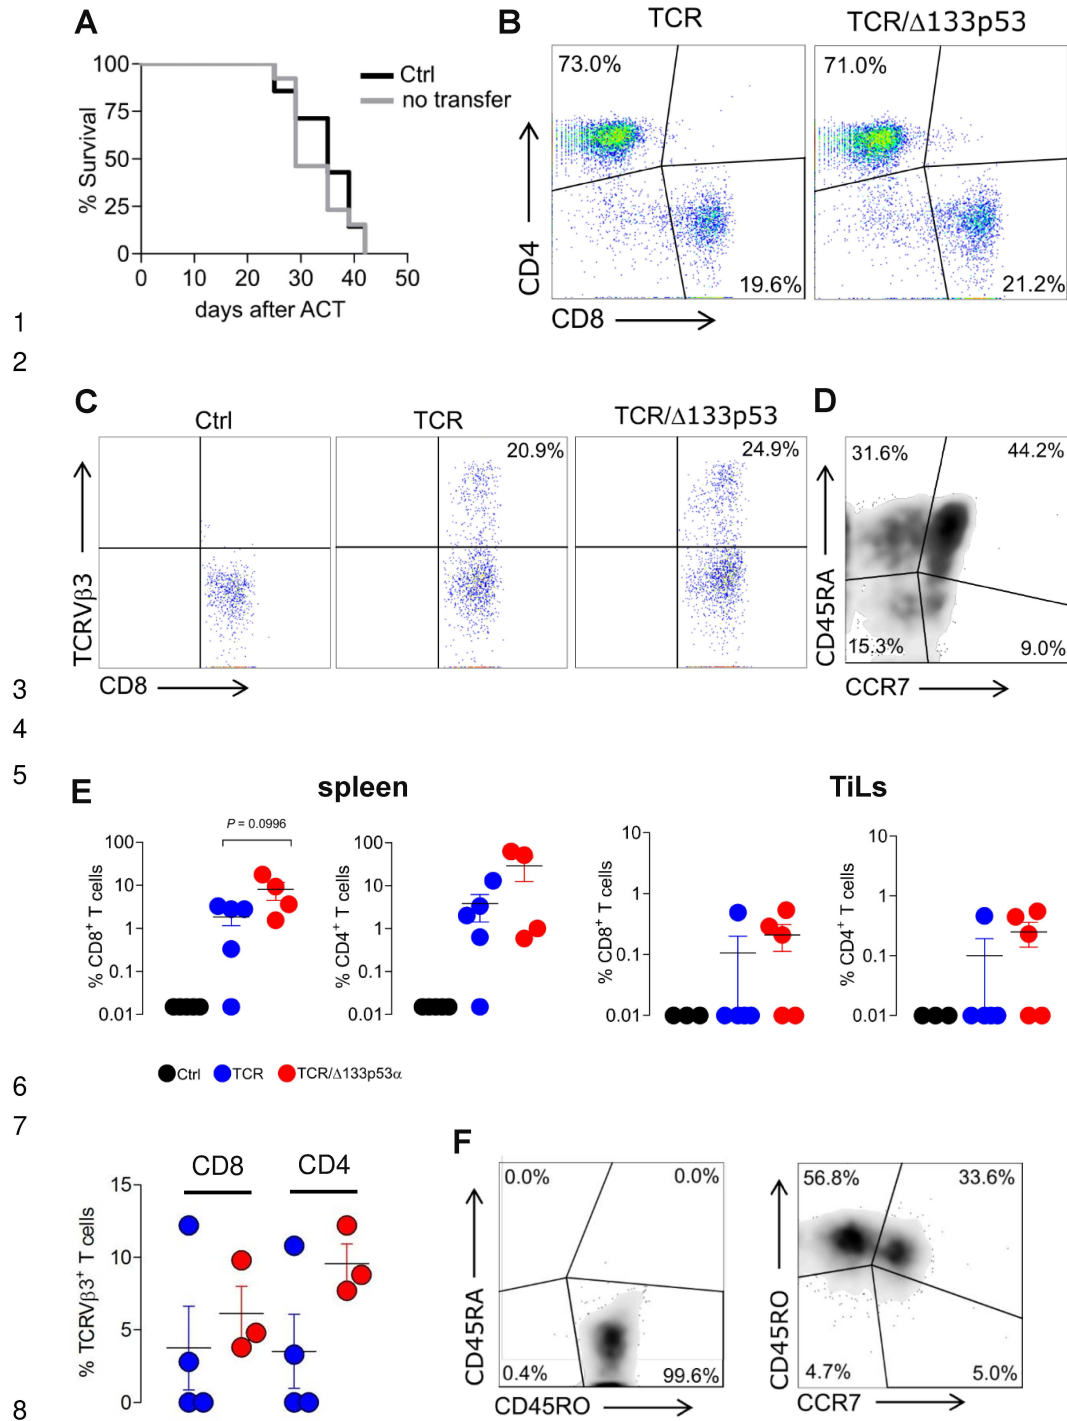

1  
2

3  
4  
5

6  
7

8  
9  
10  
11  
12

jitic-2020-001846.R2

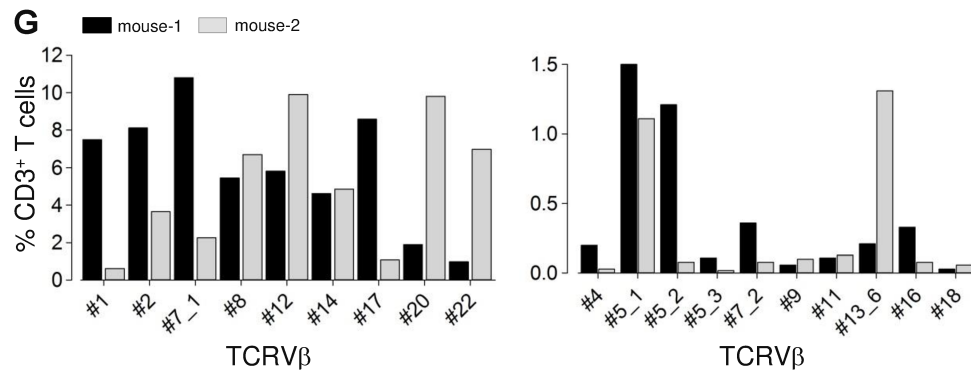

1  
2  
3  
4  
5  
6  
7  
8  
9  
10  
11  
12  
13  
14  
15  
16  
17  
18  
19  
20  
21  
22  
23  
24  
25  
26  
27  
28  
29

**Figure S7.** Phenotype and persistence of TCR/ $\Delta$ 133p53 $\alpha$ -engineered T cells in vivo. (A) Survival curves for mice treated with mock-control modified T cells (Ctrl, n=13) or no transfer T cells (PBS only, n=7). Representative flow plots show comparable starting CD8/CD4 ratio (B) and TCRV $\beta$ 3 expression (C) in  $\Delta$ 133p53 $\alpha$ - and control-T cells at the time of infusion in mice. (D) Phenotype of engineered T cells prior adoptive transfer, determined by the expression of CD45RA and CCR7. (E) Frequency of tissue-infiltrating infused T cells as percent of CD8<sup>+</sup> or CD4<sup>+</sup> T cells per spleen or tumor (TiLs) in mice at day 40-60 (endpoint) after transfer. Data represent mean numbers  $\pm$  SEM from 4-5 mice in each group. The frequency of spleen-infiltrating TCR-specific CD8<sup>+</sup> and CD4<sup>+</sup> T cells is shown as percent of TCRV $\beta$ 3<sup>+</sup> T cells per tissue. (F) Phenotype of infused T cells in vivo, characterized by the expression of CD45RA, CD45RO and CCR7. (G) Analysis of the TCR V $\beta$  repertoire of TCR-engineered T cells in vivo by flow cytometry with an antibody panel directed against 19 individual TCR/V $\beta$  chains. Histograms depicting the frequency of high (left) and rare (right) T cell clones from isolated spleens of two representative mice.

jitic-2020-001846.R2

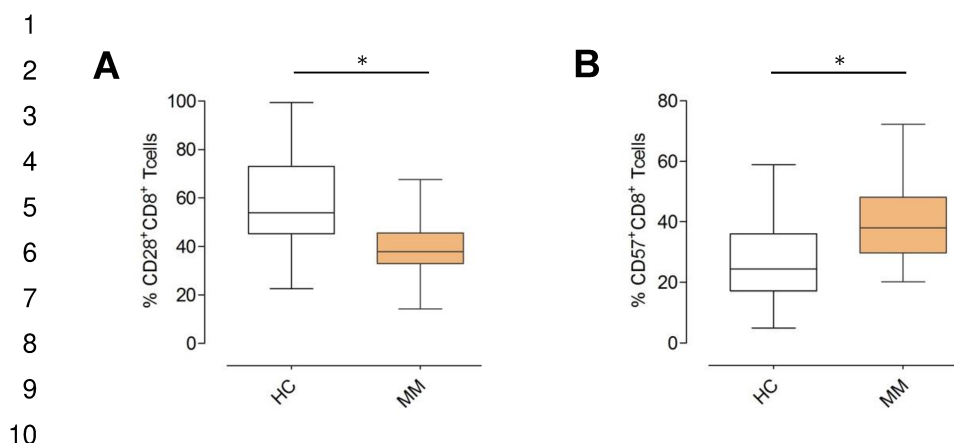

11 **Figure S8.** CD28 vs. CD57 expression profile in CD8<sup>+</sup> T cells from multiple myeloma patients.  
12 (A) Box plots demonstrating the higher frequency of total CD28<sup>+</sup>CD8<sup>+</sup> T cells in the peripheral  
13 blood from healthy controls (HC) compared to MM patients, as measured by flow cytometry ( $P$   
14 = 0.0127). (B) Box plots showing the reduced frequency of total CD57<sup>+</sup>CD8<sup>+</sup> T cells in HC  
15 compared to MM patients ( $P = 0.0166$ ). HC ( $n = 15$ ), MM ( $n = 10$ ).  $P$  values determined by two-  
16 tailed Student's  $t$  test.

17  
18  
19  
20  
21  
22  
23  
24  
25  
26  
27  
28  
29  
30  
31  
32  
33  
34  
35  
36

jitic-2020-001846.R2

1 **Table S1. Antibodies for flow cytometry**

| <b>antibodies</b>                 | <b>clone</b> | <b>source</b>            |
|-----------------------------------|--------------|--------------------------|
| anti-human CD3, APC               | UCHT1        | BD Biosciences           |
| anti-human CD3, APC-R700          | UCHT1        | BD Biosciences           |
| anti-human CD4, FITC              | RPA-T4       | BD Biosciences           |
| anti-human CD45, APC-H7           | 2D1          | BD Biosciences           |
| anti-human CD8 $\alpha$ , APC     | RPA-T8       | BD Biosciences           |
| anti-human CD8 $\alpha$ , FITC    | HIT8a        | BD Biosciences           |
| anti-human CD27, PE               | M-T271       | BD Biosciences           |
| anti-human CD27, APC              | REA499       | Miltenyi Biotec          |
| anti-human CD28, FITC             | CD28.2       | BD Biosciences           |
| anti-human CD28, PE               | CD28.2       | BD Biosciences           |
| anti-human CD57, APC              | NK-1         | BD Biosciences           |
| anti-human CD57, BV421            | NK-1         | BD Biosciences           |
| anti-human CD62L, PC-5            | DREG56       | Immunotec                |
| anti-human CCR7, FITC             | 150503       | R&D Systems              |
| anti-human PD-L1, APC             | MIH1         | BD Biosciences           |
| anti-human PD-1, APC              | J43          | ThermoFischer Scientific |
| anti-human PD-1, FITC             | MIH4         | BD Biosciences           |
| anti-human PD-1, BV421            | EH1.21       | BD Biosciences           |
| anti-human CD160, PE              | BY55         | BD Biosciences           |
| anti-human TIGIT, APC             | REA1004      | Miltenyi Biotec          |
| anti-human TIGIT, PE-Cy7          | A15153G      | BioLegend                |
| anti-human TIGIT, PE              | MBSA43       | Invitrogen               |
| anti-human CD155, APC             | 300907       | R&D Systems              |
| anti-human CD155, PE              | SKII.4       | BD Biosciences           |
| anti-human CD107a, PE-Cy5         | H4A3         | BD Biosciences           |
| anti-human CD45RA, PE             | HI100        | BD Biosciences           |
| anti-murine TCRV $\beta$ 3, PE    | KJ25         | BD Biosciences           |
| anti-human CD155 (neutralizing)   | SKII.4       | BioLegend                |
| anti-human TIGIT (neutralizing)   | MBSA43       | eBioscience              |
| anti-HLA-A2.1, PE                 | BB7.2        | BD Biosciences           |
| Anti-human GLUT1-Alexa Fluor® 647 | 202915       | BD Biosciences           |

12

jtc-2020-001846.R2

|                           |         |                 |
|---------------------------|---------|-----------------|
| anti-murine TIGIT, BV421  | 1G9     | BD Biosciences  |
| anti-murine TIGIT, PE     | REA536  | Miltenyi Biotec |
| anti-murine PD-1, APC     | J43     | Invitrogen      |
| anti-murine CD155, PE     | 3F1     | BD Biosciences  |
| anti-murine PD-L1, PE/Cy7 | 10F.9G2 | BioLegend       |

1  
2  
3  
4  
5  
6  
7  
8  
9  
10  
11  
12  
13  
14  
15  
16  
17  
18  
19  
20  
21  
22  
23  
24  
25  
26  
27  
28  
29  
30

jtc-2020-001846.R2

1 **Table S2. Primers for qRT-PCR**

| <b>Target</b> | <b>Forward</b>             | <b>Reverse</b>            |
|---------------|----------------------------|---------------------------|
| TIGIT         | TGCCAGGTTCCAGATTCCA        | ACGATGACTGCTGTGCAGATG     |
| GAPDH         | GTTTACATGTTCCAATATGATTCCAC | TCATATTTGGCAGGTTTTTCTAGAC |

2
