# Supplementary material for: Δ133p53α enhances metabolic and cellular fitness of TCR-engineered T cells and promotes superior antitumor immunity
Source: PubMed Central journal article supplement (PMC8194333; doi:10.1136/jitc-2020-001846), 2021-06-10
Supplement: jitc-2020-001846supp002.pdf [file jitc-2020-001846supp002.pdf]

**$\Delta 133p53\alpha$  enhances metabolic and cellular fitness of TCR-engineered T cells and promotes superior antitumor immunity**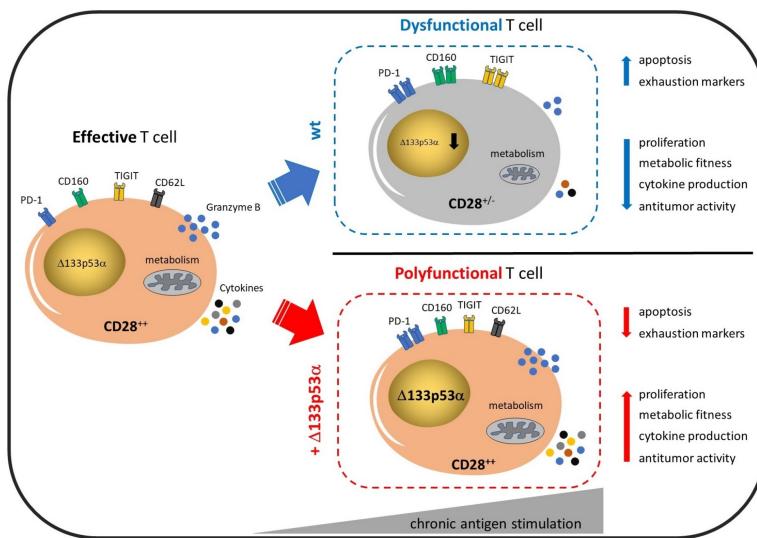**Authors**

Kevin J. Legscha, Edite Antunes Ferreira, Antonios Chamoun, Alexander Lang, Mohamed HS Awwad, Gigi NHQ Ton, Danuta Galetzka, Borhane Guezguez, Michael Hundemer, Jean-Christophe Bourdon, Markus Munder, Matthias Theobald, Hakim Echchannaoui

**Correspondence**

[echchann@uni-mainz.de](mailto:echchann@uni-mainz.de)

**In Brief**

The tumor suppressor TP53-derived isoform  $\Delta 133p53\alpha$  functions as a novel modulator of metabolic and cellular fitness of TCR-engineered T cells by delaying replicative cellular senescence, and promoting superior effector functions and enhanced antitumor-specific response.
